# Supplementary material
Source: PubMed Central journal article supplement (PMC3869788)

## **Common variants at *SCN5A/SCN10A* and *HEY2* are associated with Brugada syndrome, a rare disease with high risk of sudden cardiac death**

Connie R. Bezzina<sup>1\*</sup>, Julien Barc<sup>1,2\*</sup>, Yuka Mizusawa<sup>1\*</sup>, Carol Ann Remme<sup>1\*</sup>, Jean-Baptiste Gourraud<sup>3,4,5,6\*</sup>, Floriane Simonet<sup>3,4,5</sup>, Arie O. Verkerk<sup>7</sup>, Peter J. Schwartz<sup>8-13</sup>, Lia Crotti<sup>8,9,14</sup>, Federica Dagradi<sup>8,9</sup>, Pascale Guicheney<sup>15,16</sup>, Véronique Fressart<sup>15,16,17</sup>, Antoine Leenhardt<sup>18,19,20</sup>, Charles Antzelevitch<sup>21</sup>, Susan Bartkowiak<sup>21</sup>, Eric Schulze-Bahr<sup>22</sup>, Sven Zumhagen<sup>22</sup>, Elijah R. Behr<sup>23</sup>, Rachel Bastiaenen<sup>23</sup>, Jacob Tfelt-Hansen<sup>24,25</sup>, Morten Salling Olesen<sup>24,25</sup>, Stefan Käåb<sup>26,27</sup>, Britt M. Beckmann<sup>26,27</sup>, Peter Weeke<sup>28</sup>, Hiroshi Watanabe<sup>29</sup>, Naoto Endo<sup>30</sup>, Tohru Minamino<sup>29</sup>, Minoru Horie<sup>31</sup>, Seiko Ohno<sup>31</sup>, Kanae Hasegawa<sup>31</sup>, Naomasa Makita<sup>32</sup>, Akihiko Nogami<sup>33</sup>, Wataru Shimizu<sup>34,35</sup>, Takeshi Aiba<sup>35</sup>, Philippe Froguel<sup>36,37,38</sup>, Beverley Balkau<sup>39,40</sup>, Olivier Lantieri<sup>41</sup>, Margherita Torchio<sup>8,9</sup>, Cornelia Wiese<sup>42</sup>, David Weber<sup>42</sup>, Rianne Wolswinkel<sup>1</sup>, Ruben Coronel<sup>1</sup>, Bas J. Boukens<sup>1,7</sup>, Stéphane Bézieau<sup>43</sup>, Eric Charpentier<sup>3,4,5</sup>, Stéphanie Chatel<sup>3,4,5,6</sup>, Aurore Despres<sup>3,4,5,6</sup>, Françoise Gros<sup>3,4,5</sup>, Florence Kyndt<sup>3,4,5,6,43</sup>, Simon Lecointe<sup>3,4,5,6</sup>, Pierre Lindenbaum<sup>3,4,5,6</sup>, Vincent Portero<sup>3,4,5</sup>, Jade Violleau<sup>3,4,5,6</sup>, Manfred Gessler<sup>42</sup>, Hanno L. Tan<sup>1</sup>, Dan Roden<sup>28</sup>, Vincent M. Christoffels<sup>7</sup>, Hervé Le Marec<sup>3,4,5,6</sup>, Arthur A. Wilde<sup>1\*</sup>, Vincent Probst<sup>3,4,5,6\*</sup>, Jean-Jacques Schott<sup>3,4,5,6\*</sup>, Christian Dina<sup>3,4,5,6\*</sup> & Richard Redon<sup>3,4,5,6\*</sup>

### **SUPPLEMENTARY INFORMATION**

1. Supplementary Tables 1 – 6 Page 2
2. Supplementary Figures 1 – 12 Page 8

Supplementary Table 1: Summarized clinical information on 1,114 patients with Brugada syndrome

| <i>Clinical Centre</i>       | <i>n</i> | <i>Males</i> | <i>Age at diagnosis</i> | <i>Baseline Type-I ECG</i> | <i>Symptoms <sup>(1)</sup></i> | <i>SCN5A carriers</i> |
|------------------------------|----------|--------------|-------------------------|----------------------------|--------------------------------|-----------------------|
| Nantes (FR)                  | 422      | 323 (77%)    | 48 (+/-13)              | 295 (46%)                  | 153 (36%)                      | 71 (17%)              |
| Pavia (IT)                   | 126      | 105 (83%)    | 42 (+/-14)              | 46 (37%)                   | 16 (13%)                       | 20 (16%)              |
| Amsterdam (NL)               | 101      | 84 (83%)     | 48 (+/-13)              | 46 (46%)                   | 52 (51%)                       | 23 (23%)              |
| Paris (FR)                   | 93       | 84 (90%)     | 44 (+/-13)              | 56 (60%)                   | 28 (30%)                       | 15 (16%)              |
| Utica (US)                   | 74       | 49 (66%)     | 42 (+/-17)              | 24 (32%)                   | 41 (55%)                       | 10 (14%)              |
| Other Centers <sup>(2)</sup> | 90       | 71 (79%)     | 44 (+/-14)              | 47 (52%)                   | 42 (47%)                       | 21 (23%)              |
| Japan <sup>(3)</sup>         | 208      | 190 (91%)    | 46 (+/-15)              | 95 (46%)                   | 84 (40%)                       | 29 (14%)              |

<sup>(1)</sup> Ventricular tachycardia, ventricular fibrillation, syncope and near syncope

<sup>(2)</sup> Munster (DE), London (UK), Copenhagen (DK), Munich (DE), Nashville (US)

<sup>(3)</sup> Osaka, Nagasaki, Shiga

Supplementary Table 2: List of SNPs reaching genome-wide significance in the GWAS

| SNP        | Chromosome | Position  | closest gene(s)    | Risk allele | Protective allele | P-value  | Odds ratio (95% CI)     |
|------------|------------|-----------|--------------------|-------------|-------------------|----------|-------------------------|
| rs6599240  | 3          | 38738717  | <i>SCN10A</i>      | A           | G                 | 1,20E-13 | 2.0696 [1.7076-2.5084]  |
| rs11129801 | 3          | 38750375  | <i>SCN10A</i>      | G           | A                 | 2,77E-08 | 1.9969 [1.5645-2.5487]  |
| rs9874633  | 3          | 38771994  | <i>SCN10A</i>      | A           | G                 | 1,66E-13 | 2.7009 [2.0742-3.5169]  |
| rs10428132 | 3          | 38777554  | <i>SCN10A</i>      | T           | G                 | 6,79E-26 | 3.0026 [2.4465-3.6851]  |
| rs7428167  | 3          | 38778191  | <i>SCN10A</i>      | T           | C                 | 1,22E-22 | 2.8625 [2.3191-3.5331]  |
| rs10428168 | 3          | 38780059  | <i>SCN10A</i>      | T           | C                 | 2,36E-15 | 2.6190 [2.0636-3.3238]  |
| rs12638572 | 3          | 38787797  | <i>SCN10A</i>      | A           | G                 | 2,48E-10 | 2.1155 [1.6773-2.6680]  |
| rs7641844  | 3          | 38802251  | <i>SCN10A</i>      | A           | G                 | 3,80E-08 | 2.0198 [1.5722-2.5947]  |
| rs7430439  | 3          | 38803639  | <i>SCN10A</i>      | G           | A                 | 1,10E-08 | 1.7533 [1.4460- 2.1258] |
| rs6599257  | 3          | 38804588  | <i>SCN10A</i>      | C           | T                 | 1,01E-14 | 2.1738 [1.7858-2.6460]  |
| rs1268070  | 6          | 126041164 | <i>HEY2</i>        | C           | T                 | 5,13E-09 | 1.8030 [1.4795-2.1973]  |
| rs9388451  | 6          | 126090377 | <i>HEY2, NCOA7</i> | C           | T                 | 8,85E-10 | 1.8325 [1.5099-2.2240]  |

Supplementary Table 3: GWAS results for hit-SNPs from previously associated with ECG traits

| SNP               | Cyto Band      | Nearest genes                         | MAF               | General trait | allele_A | allele_B | cases_maf    | controls_maf | tinfo        | beta          | se           | P-value         |
|-------------------|----------------|---------------------------------------|-------------------|---------------|----------|----------|--------------|--------------|--------------|---------------|--------------|-----------------|
| rs846111          | 1p36.31        | RNF207,NPHP4,CHDS,ACOT7,PLEKHG5,KLH20 | 0.26              | QTc           | G        | C        | 0,253        | 0,268        | 0,493        | -0,126        | 0,148        | 3,94E-01        |
| rs9436640         | 1p31.3p31.2    | NFIA                                  | 0.48              | QRS           | T        | G        | 0,468        | 0,448        | 0,950        | 0,078         | 0,095        | 4,09E-01        |
| rs4074536         | 1p13.3p11      | CASQ2                                 | 0.30              | QRS           | T        | C        | 0,309        | 0,290        | 1,000        | 0,080         | 0,101        | 4,31E-01        |
| rs2880058         | 1q23.3         | NOS1AP                                | 0.26              | QTc           | A        | G        | 0,358        | 0,337        | 0,893        | 0,146         | 0,103        | 1,56E-01        |
| rs12143842        | 1q23.3         | NOS1AP                                | 0.16              | QTc           | C        | T        | 0,274        | 0,254        | 1,000        | 0,157         | 0,107        | 1,41E-01        |
| rs10494366        | 1q23.3         | NOS1AP                                | 0.33              | QTc           | G        | T        | 0,399        | 0,365        | 1,000        | -0,159        | 0,095        | 9,59E-02        |
| rs16857031        | 1q23.3         | NOS1AP                                | 0.15              | QTc           | C        | G        | 0,146        | 0,145        | 1,000        | 0,054         | 0,131        | 6,82E-01        |
| rs12029454        | 1q23.3         | NOS1AP                                | 0.11              | QTc           | G        | A        | 0,176        | 0,165        | 1,000        | 0,107         | 0,126        | 3,96E-01        |
| rs4657178         | 1q23.3         | NOS1AP                                | 0.18              | QTc           | C        | T        | 0,272        | 0,275        | 1,000        | 0,026         | 0,103        | 8,03E-01        |
| rs10919071        | 1q24.2         | ATP1B1                                | 0.11              | QTc           | A        | G        | 0,109        | 0,138        | 1,000        | -0,241        | 0,140        | 8,47E-02        |
| rs12731740        | 1q32.2         | CD46,CD34,PLXNA2PLXNA2                | 0.09              | Heart rate    | C        | T        | 0,115        | 0,101        | 1,000        | 0,127         | 0,149        | 3,94E-01        |
| rs2745967         | 1q32           | CD34                                  | 0.49              | Heart rate    | G        | A        | 0,372        | 0,371        | 1,000        | 0,035         | 0,095        | 7,17E-01        |
| rs17391905        | 1p32.3         | C1orf185,RNF11,CDKN2C,FAF1            | 0.03              | QRS           | NA       | NA       | NA           | NA           | NA           | NA            | NA           | NA              |
| rs7562790         | 2p21           | CRIM1                                 | 0.36              | QRS           | T        | G        | 0,396        | 0,406        | 0,998        | -0,028        | 0,095        | 7,68E-01        |
| rs17020136        | 2p22.2         | HEATR5B,STRN                          | 0.23              | QRS           | T        | C        | 0,213        | 0,182        | 0,998        | 0,206         | 0,119        | 8,32E-02        |
| rs10865355        | 2p14           | MEIS1                                 | 0.46/0.48*        | PR            | A        | G        | 0,402        | 0,377        | 0,999        | -0,064        | 0,099        | 5,14E-01        |
| rs11897119        | 2p14           | MEIS1                                 | 0.46              | PR            | T        | C        | 0,401        | 0,377        | 0,997        | 0,057         | 0,099        | 5,63E-01        |
| rs2051211         | 3p22.2         | SCN5A,SCN10A                          | 0.19              | QRS           | A        | G        | 0,217        | 0,255        | 0,995        | -0,205        | 0,108        | 5,88E-02        |
| rs10865879        | 3p22.2         | SCN5A,SCN10A                          | 0.26              | QRS           | A        | C        | 0,282        | 0,233        | 0,949        | 0,246         | 0,112        | 2,81E-02        |
| rs11129795        | 3p22.2         | SCN5A,SCN10A                          | 0.25              | QRS           | G        | A        | 0,284        | 0,233        | 0,960        | 0,255         | 0,111        | 2,18E-02        |
| rs12053903        | 3p22.2         | SCN5A                                 | 0.29              | QTc           | T        | C        | 0,394        | 0,327        | 0,950        | 0,298         | 0,101        | 3,15E-03        |
| rs3922844         | 3p22.2         | SCN5A,SCN10A                          | 0.26/0.68*        | PR            | T        | C        | 0,233        | 0,298        | 0,967        | 0,344         | 0,107        | 1,29E-03        |
| <b>rs11708996</b> | <b>3p22.2</b>  | <b>SCN5A,SCN10A</b>                   | <b>0.17</b>       | <b>PR/QRS</b> | <b>G</b> | <b>C</b> | <b>0,228</b> | <b>0,151</b> | <b>1,000</b> | <b>0,540</b>  | <b>0,121</b> | <b>8,65E-06</b> |
| rs6599222         | 3p22.2         | SCN5A,SCN10A                          | 0.23/0.29*        | PR            | C        | T        | 0,286        | 0,218        | 0,897        | -0,411        | 0,114        | 3,19E-04        |
| rs11710077        | 3p22.2         | SCN5A,SCN10A                          | 0.18              | QRS           | A        | T        | 0,166        | 0,197        | 0,682        | -0,266        | 0,146        | 6,79E-02        |
| rs9851724         | 3p22.2         | SCN5A,SCN10A                          | 0.28              | QRS           | C        | T        | 0,226        | 0,307        | 0,981        | 0,387         | 0,102        | 1,56E-04        |
| <b>rs6795970</b>  | <b>3p22.2</b>  | <b>SCN5A,SCN10A</b>                   | <b>0.42</b>       | <b>PR/QRS</b> | <b>A</b> | <b>G</b> | <b>0,668</b> | <b>0,410</b> | <b>0,968</b> | <b>-0,993</b> | <b>0,091</b> | <b>1,11E-27</b> |
| <b>rs6798015</b>  | <b>3p22.2</b>  | <b>SCN5A,SCN10A</b>                   | <b>0.38/0.06*</b> | <b>PR</b>     | <b>C</b> | <b>T</b> | <b>0,607</b> | <b>0,364</b> | <b>0,952</b> | <b>-0,985</b> | <b>0,093</b> | <b>3,53E-26</b> |
| rs7627552         | 3p22.2         | SCN5A,SCN10A                          | 0.18*             | PR            | NA       | NA       | NA           | NA           | NA           | NA            | NA           | NA              |
| rs4687718         | 3p14.3         | TKT,PRKCD,CACNA1D                     | 0.13              | QRS           | A        | G        | 0,120        | 0,118        | 0,949        | 0,005         | 0,146        | 9,74E-01        |
| rs2242285         | 3p14.1         | LRIG-SLC25A26                         | 0.37              | QRS           | A        | G        | 0,436        | 0,400        | 0,988        | -0,130        | 0,097        | 1,81E-01        |
| rs7660702         | 4q22.1         | ARHGAP24                              | 0.25              | PR            | T        | C        | 0,277        | 0,303        | 1,000        | -0,121        | 0,101        | 2,27E-01        |
| rs13165478        | 5q33           | HAND1,SAP30L                          | 0.33              | QRS           | G        | A        | 0,339        | 0,380        | 0,993        | -0,204        | 0,097        | 3,60E-02        |
| rs251253          | 5q35.1         | C5orf41,NKX2.5                        | 0.38              | PR            | C        | T        | 0,438        | 0,377        | 0,937        | -0,276        | 0,097        | 4,58E-03        |
| rs1321311         | 6p21.2         | P116,CDKN1A                           | 0.31              | QRS           | C        | A        | 0,267        | 0,248        | 0,986        | 0,083         | 0,106        | 4,35E-01        |
| rs281868          | 6q22.31        | C6orf204,SLC35F1,PLN,BRD7P3,ASF1A     | 0.48              | Heart rate    | G        | A        | 0,478        | 0,490        | 0,995        | -0,057        | 0,092        | 5,34E-01        |
| rs11153730        | 6q22.31        | C6orf204,SLC35F1,PLN,BRD7P3,ASF1A     | 0.48              | QRS           | T        | C        | 0,470        | 0,463        | 0,982        | 0,020         | 0,094        | 8,30E-01        |
| rs11970286        | 6q22.1-6q22.31 | C6orf204,SLC35F1,PLN,BRD7P3,ASF1A     | 0.47              | QTc           | C        | T        | 0,427        | 0,422        | 0,985        | -0,001        | 0,094        | 9,89E-01        |
| rs12210810        | 6q22.1-6q22.31 | C6orf204,SLC35F1,PLN,BRD7P3,ASF1A     | 0.08              | QTc           | NA       | NA       | NA           | NA           | NA           | NA            | NA           | NA              |
| rs11154022        | 6q21q23.2      | GJA1                                  | 0.29              | Heart rate    | A        | G        | 0,337        | 0,339        | 0,998        | -0,024        | 0,097        | 8,02E-01        |
| rs9398652         | 6q21q23.2      | GJA1                                  | 0.07              | Heart rate    | C        | A        | 0,085        | 0,099        | 0,991        | -0,146        | 0,161        | 3,64E-01        |
| rs1362212         | 7p14.3         | TBX20                                 | 0.13              | QRS           | G        | A        | 0,226        | 0,182        | 0,999        | 0,319         | 0,116        | 6,02E-03        |
| rs7784776         | 7p12.3         | IGFBP3                                | 0.48              | QRS           | A        | G        | 0,430        | 0,420        | 0,984        | 0,067         | 0,097        | 4,87E-01        |
| rs314370          | 7q22           | SLC12A9,UFSP1                         | 0.22              | Heart rate    | T        | C        | 0,176        | 0,189        | 0,930        | -0,128        | 0,122        | 2,94E-01        |
| rs3807989         | 7q31.1         | CAV1/CAV2                             | 0.43              | PR            | A        | G        | 0,471        | 0,401        | 1,000        | -0,273        | 0,092        | 2,94E-03        |
| rs2968863         | 7q36.1         | KCNH2                                 | 0.26              | QTc           | C        | T        | 0,245        | 0,277        | 0,989        | -0,112        | 0,106        | 2,92E-01        |
| rs4725982         | 7q36.1         | KCNH2                                 | 0.18              | QTc           | C        | T        | 0,221        | 0,204        | 0,955        | 0,124         | 0,117        | 2,90E-01        |
| rs17333724        | 10q11.2        | DDK2                                  | 0.23              | QRS           | A        | G        | 0,260        | 0,238        | 0,996        | -0,121        | 0,106        | 2,56E-01        |
| rs7342028         | 10q25.2        | VTI1A                                 | 0.27              | QRS           | G        | T        | 0,260        | 0,277        | 0,981        | -0,058        | 0,103        | 5,75E-01        |
| rs2074238         | 11p15.5        | KCNQ1                                 | 0.08              | QTc           | T        | C        | 0,093        | 0,079        | 0,480        | -0,499        | 0,245        | 4,17E-02        |
| rs12296050        | 11p15.5        | KCNQ1                                 | 0.23              | QTc           | C        | T        | 0,180        | 0,196        | 0,780        | -0,145        | 0,132        | 2,73E-01        |
| rs12576239        | 11p15.5        | KCNQ1                                 | 0.16              | QTc           | C        | T        | 0,124        | 0,134        | 0,848        | -0,136        | 0,146        | 3,52E-01        |
| rs174547          | 11q12.2q13.1   | FADS1                                 | 0.38              | Heart rate    | T        | C        | 0,329        | 0,305        | 0,994        | 0,069         | 0,099        | 4,90E-01        |
| rs4944092         | 11q13.5        | WNT11                                 | 0.29              | PR            | A        | G        | 0,291        | 0,307        | 0,609        | -0,117        | 0,128        | 3,61E-01        |
| rs17287293        | 12p12.1        | SOX5,BCAT1                            | 0.15              | Heart rate    | A        | G        | 0,171        | 0,158        | 0,997        | 0,144         | 0,127        | 2,56E-01        |
| rs11047543        | 12p12.1        | SOX5,BCAT1                            | 0.15              | PR            | G        | A        | 0,176        | 0,159        | 1,000        | 0,177         | 0,125        | 1,57E-01        |
| rs883079          | 12q24.21       | TBX3,TBX5                             | 0.28              | QRS           | C        | T        | 0,356        | 0,280        | 1,000        | -0,356        | 0,101        | 3,97E-04        |
| rs3825214         | 12q24.21       | TBX5                                  | 0.22              | QTc           | G        | A        | 0,252        | 0,190        | 1,000        | -0,367        | 0,115        | 1,38E-03        |
| rs7312625         | 12q24.21       | TBX3,TBX5                             | 0.27/0.25*        | PR            | G        | A        | 0,338        | 0,264        | 0,995        | -0,352        | 0,102        | 5,46E-04        |
| rs1896312         | 12q24.21       | TBX3,TBX5                             | 0.38              | PR            | C        | T        | 0,303        | 0,286        | 0,990        | -0,054        | 0,102        | 6,00E-01        |
| rs10850409        | 12q24.21       | TBX3,TBX5                             | 0.32              | QRS           | G        | A        | 0,278        | 0,269        | 0,969        | 0,031         | 0,104        | 7,69E-01        |
| rs885389          | 12q24.33       | GPR133                                | 0.29              | Heart rate    | A        | G        | 0,375        | 0,332        | 0,971        | -0,171        | 0,099        | 8,33E-02        |
| rs3825214         | 12q24.21       | TBX3,TBX5                             | 0.22              | PR/QRS, QTc   | G        | A        | 0,252        | 0,190        | 1,000        | -0,367        | 0,115        | 1,38E-03        |
| rs2478333         | 13q12.2q13.3   | SUCLA2                                | 0.35              | QTc           | C        | A        | 0,364        | 0,353        | 1,000        | 0,026         | 0,096        | 7,84E-01        |
| rs1886512         | 13q22          | KLF12                                 | 0.33              | QRS           | T        | A        | 0,363        | 0,378        | 0,994        | -0,072        | 0,094        | 4,45E-01        |
| rs365990          | 14q11.2        | MYH6,MYH7,NDNG,ZFH2                   | 0.31              | Heart rate    | A        | G        | 0,383        | 0,378        | 0,613        | 0,047         | 0,123        | 7,05E-01        |
| rs223116          | 14q11.2        | MYH6,MYH7,NDNG,ZFH2                   | 0.25              | Heart rate    | A        | G        | 0,265        | 0,253        | 0,770        | -0,101        | 0,120        | 4,02E-01        |
| rs11848785        | 14q24.2        | SIPA1L1                               | 0.30              | QRS           | G        | A        | 0,296        | 0,270        | 0,991        | -0,160        | 0,107        | 1,34E-01        |
| rs8049607         | 16p13.13       | LITAF,CLEC16A,SNN,ZC3H7A,TNFRSF16     | 0.49              | QTc           | T        | C        | 0,484        | 0,481        | 0,940        | 0,018         | 0,099        | 8,58E-01        |
| rs37062           | 16q21          | CNOT1,GINS3,SLC38A7,GOT1              | 0.27              | QTc           | A        | G        | 0,260        | 0,239        | 0,997        | 0,081         | 0,107        | 4,48E-01        |
| rs2074518         | 17q11.2q12     | LIG3,RFFL                             | 0.49              | QTc           | C        | T        | 0,479        | 0,456        | 0,994        | 0,059         | 0,093        | 5,27E-01        |
| rs17608766        | 17q21          | GOSR2                                 | 0.09              | QRS           | T        | C        | 0,136        | 0,135        | 1,000        | 0,031         | 0,133        | 8,14E-01        |
| rs9912468         | 17q22q23.2     | PRKCA                                 | 0.42              | QRS           | G        | C        | 0,473        | 0,454        | 1,000        | -0,099        | 0,090        | 2,73E-01        |
| rs17779747        | 17q24.3        | KCNJ2                                 | 0.32              | QTc           | G        | T        | 0,353        | 0,332        | 0,995        | 0,109         | 0,097        | 2,63E-01        |
| rs991014          | 18q21.1        | SETBP1                                | 0.41              | QRS           | C        | T        | 0,405        | 0,403        | 1,000        | 0,004         | 0,095        | 9,66E-01        |
| rs1805128         | 21q22.12       | KCNE1                                 | 0.03              | QTc           | NA       | NA       | NA           | NA           | NA           | NA            | NA           | NA              |

Supplementary Table 4 : Cumulative effect of the three associated SNPs on susceptibility to Brugada syndrome, in Europe and Japan

| Nb of at-risk alleles | Europe     |         |                     | Japan      |         |                    |
|-----------------------|------------|---------|---------------------|------------|---------|--------------------|
|                       | % controls | % cases | OR                  | % controls | % cases | OR                 |
| 0-1                   | 27.8       | 9.7     | 1                   | 40.0       | 15.4    | 1                  |
| 2                     | 35.8       | 21.8    | 1.69 [1.27-2.26]    | 40.9       | 37.0    | 2.35 [1.52-3.63]   |
| 3                     | 25.5       | 33.6    | 3.69 [2.78-4.89]    | 15.2       | 30.3    | 5.18 [3.26-8.25]   |
| 4                     | 9.4        | 26.2    | 7.89 [5.75-10.81]   | 3.7        | 14.4    | 10.14 [5.56-18.49] |
| 5-6                   | 1.5        | 8.7     | 19.89 [11.68-33.86] | 0.1        | 2.9     | 75.00 [8.76-642.2] |

Supplementary Table 5: Subset analyses testing for association with symptoms, baseline type-1 ECG and SCN5A mutation status

| Trait            | SNP          | Population | Affected (PP PR RR) |     |     | Non aff. (PP PR RR) |     |     | beta add      | p add        |
|------------------|--------------|------------|---------------------|-----|-----|---------------------|-----|-----|---------------|--------------|
| Symptoms         | rs11708996_C | Europe     | 200                 | 110 | 15  | 317                 | 198 | 33  | <b>-0,163</b> | <b>0,172</b> |
|                  |              | Japan      | 66                  | 15  | 3   | 105                 | 16  | 0   | <b>0,630</b>  | <b>0,066</b> |
|                  |              | All        | 266                 | 125 | 18  | 422                 | 214 | 33  | <b>-0,074</b> | <b>0,509</b> |
|                  | rs10428132_T | Europe     | 31                  | 138 | 162 | 76                  | 240 | 232 | <b>0,277</b>  | <b>0,009</b> |
|                  |              | Japan      | 32                  | 34  | 17  | 37                  | 56  | 28  | <b>-0,205</b> | <b>0,293</b> |
|                  |              | All        | 63                  | 172 | 179 | 113                 | 296 | 260 | <b>0,170</b>  | <b>0,065</b> |
|                  | rs9388451_C  | Europe     | 48                  | 157 | 123 | 99                  | 240 | 218 | <b>0,027</b>  | <b>0,783</b> |
|                  |              | Japan      | 8                   | 38  | 37  | 9                   | 44  | 68  | <b>-0,337</b> | <b>0,132</b> |
|                  |              | All        | 56                  | 195 | 160 | 108                 | 284 | 286 | <b>-0,032</b> | <b>0,722</b> |
| Baseline BrS ECG | rs11708996_C | Europe     | 250                 | 134 | 24  | 274                 | 179 | 25  | <b>-0,102</b> | <b>0,377</b> |
|                  |              | Japan      | 76                  | 15  | 3   | 97                  | 16  | 0   | <b>0,414</b>  | <b>0,228</b> |
|                  |              | All        | 326                 | 149 | 27  | 371                 | 195 | 25  | <b>-0,045</b> | <b>0,682</b> |
|                  | rs10428132_T | Europe     | 46                  | 185 | 179 | 63                  | 198 | 220 | <b>-0,003</b> | <b>0,974</b> |
|                  |              | Japan      | 30                  | 43  | 22  | 40                  | 47  | 24  | <b>0,095</b>  | <b>0,620</b> |
|                  |              | All        | 76                  | 228 | 201 | 103                 | 245 | 244 | <b>0,020</b>  | <b>0,822</b> |
|                  | rs9388451_C  | Europe     | 64                  | 189 | 157 | 86                  | 213 | 189 | <b>0,009</b>  | <b>0,926</b> |
|                  |              | Japan      | 7                   | 37  | 50  | 10                  | 45  | 57  | <b>0,093</b>  | <b>0,678</b> |
|                  |              | All        | 71                  | 226 | 207 | 96                  | 258 | 246 | <b>0,028</b>  | <b>0,755</b> |
| SCN5A mutation   | rs11708996_C | Europe     | 100                 | 50  | 8   | 419                 | 262 | 40  | <b>-0,134</b> | <b>0,385</b> |
|                  |              | Japan      | 24                  | 3   | 1   | 149                 | 28  | 2   | <b>-0,093</b> | <b>0,855</b> |
|                  |              | All        | 124                 | 53  | 9   | 568                 | 290 | 42  | <b>-0,127</b> | <b>0,391</b> |
|                  | rs10428132_T | Europe     | 19                  | 79  | 62  | 89                  | 299 | 336 | <b>-0,215</b> | <b>0,097</b> |
|                  |              | Japan      | 15                  | 12  | 2   | 55                  | 78  | 44  | <b>-0,839</b> | <b>0,010</b> |
|                  |              | All        | 34                  | 91  | 64  | 144                 | 377 | 380 | <b>-0,306</b> | <b>0,009</b> |
|                  | rs9388451_C  | Europe     | 24                  | 76  | 60  | 125                 | 325 | 281 | <b>0,061</b>  | <b>0,633</b> |
|                  |              | Japan      | 2                   | 9   | 17  | 15                  | 73  | 90  | <b>0,305</b>  | <b>0,365</b> |
|                  |              | All        | 26                  | 85  | 77  | 140                 | 398 | 371 | <b>0,095</b>  | <b>0,423</b> |

\* PP: homozygous for the protective allele ; PR : heterozygous ; RR: homozygous for the risk alleles

Supplementary Table 6: Independent heterozygote effects for the three associated SNPs

| SNP        | OR               | Z score | p-value  |
|------------|------------------|---------|----------|
| rs11708996 | 1.01 [0.79-1.29] | 0.07    | 9.46E-01 |
| rs10428132 | 0.92 [0.79-1.07] | -1.06   | 2.90E-01 |
| rs9388451  | 0.86 [0.74-1.01] | -1.84   | 6.55E-02 |

**Supplementary Figure 1: Multidimensional scaling (MDS) identifies 42 samples of non-European descent**

On the left-panels, the first 3 principal components are plotted against one another for combined genotype data from cases, D.E.S.I.R. controls, and individuals from the 1000 Genomes Project (EUR, European; AFR, African; ASN, East Asian; AMR, Admixed American). The right-panels are zoomed views from the same plots, where 42 samples of Non-European descent, which were excluded from the GWAS study, are displayed in grey.

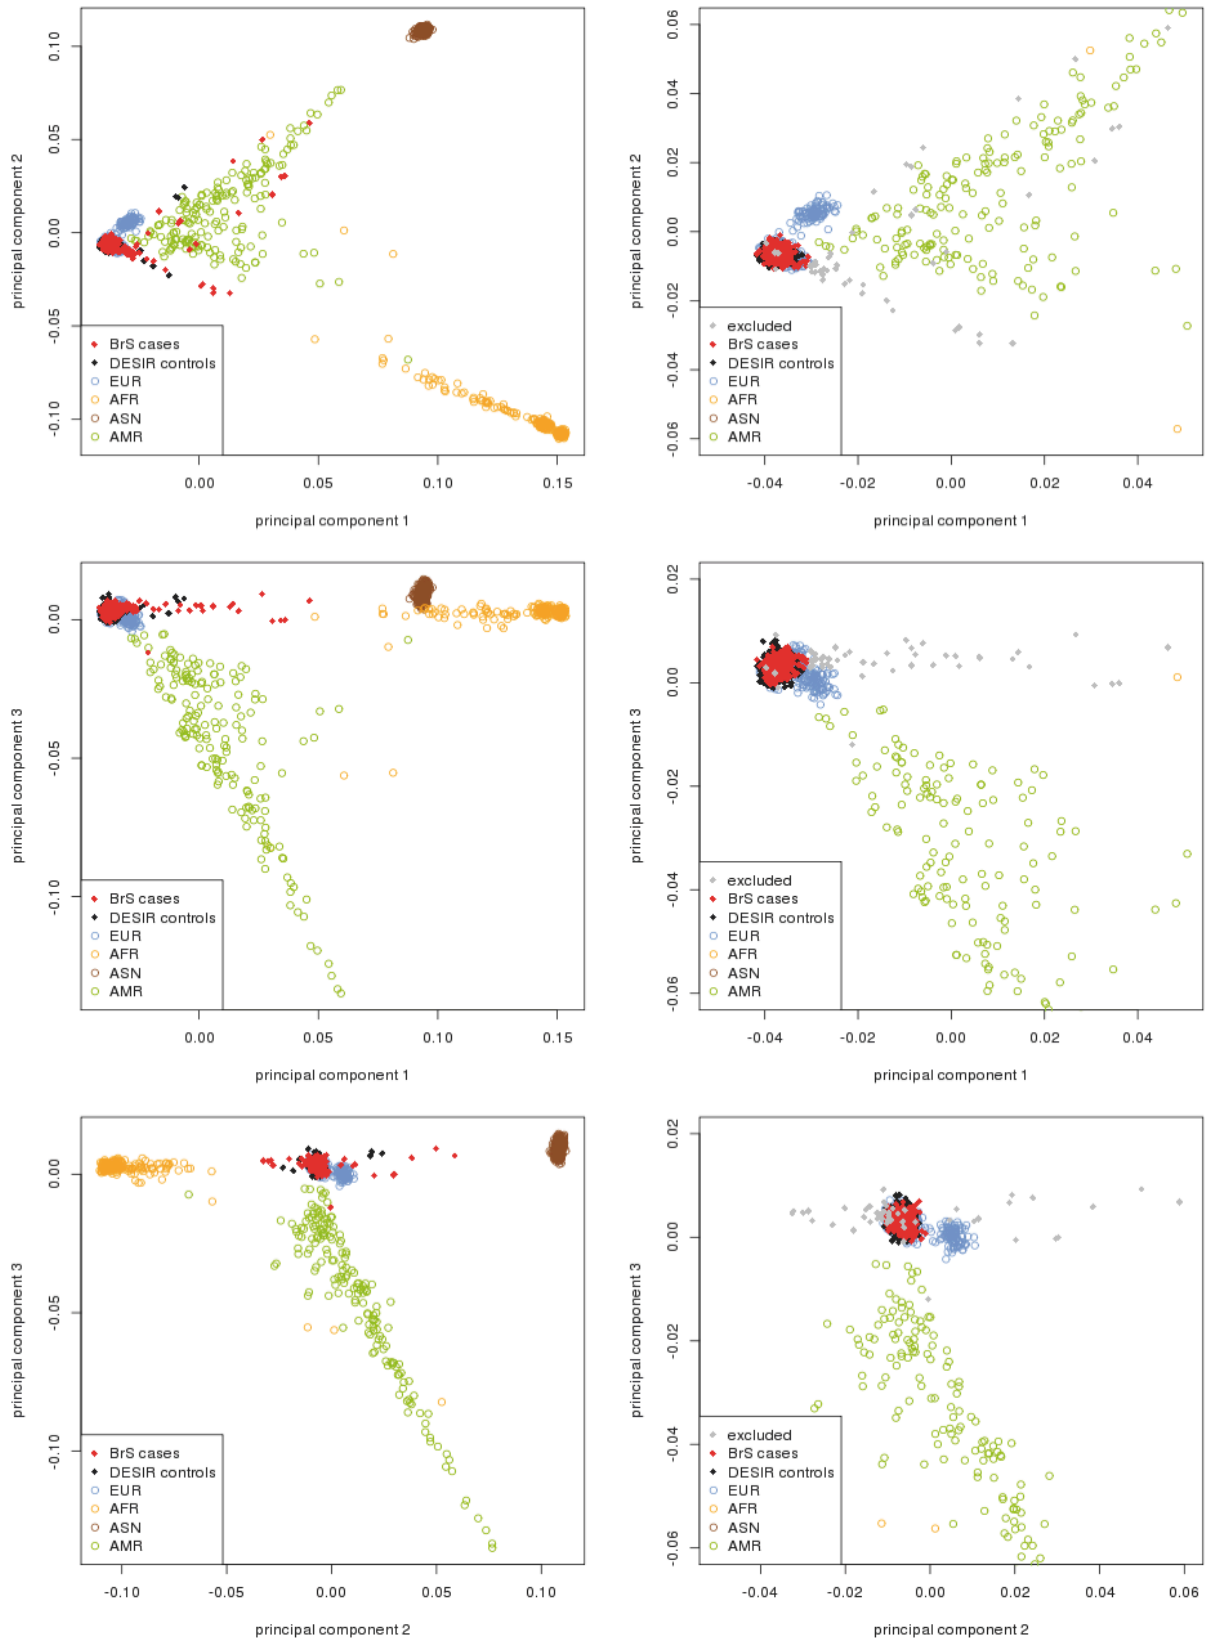



## Supplementary Figure 2: MDS on samples of European ancestry defines 2 homogeneous case-control sets suitable for GWAS

MDS including genotype data of European descent individuals drawn from 1000 Genomes Project indicates, as displayed in the left-panels, that the corresponding individuals can be used as additional controls in the present study. The GWAS was conducted separately on the two homogeneous case-control groups thus identified (shown respectively on the middle- and right-panels). The association data obtained on both groups were subsequently combined in a meta-analysis, which included a total of 312 cases and 1,115 ancestry-matched controls. CEU, Utah residents (CEPH) with Northern and Western European ancestry; GBR, British from England and Scotland; TSI, Tuscan from Italy; IBS, Iberian populations from Spain.

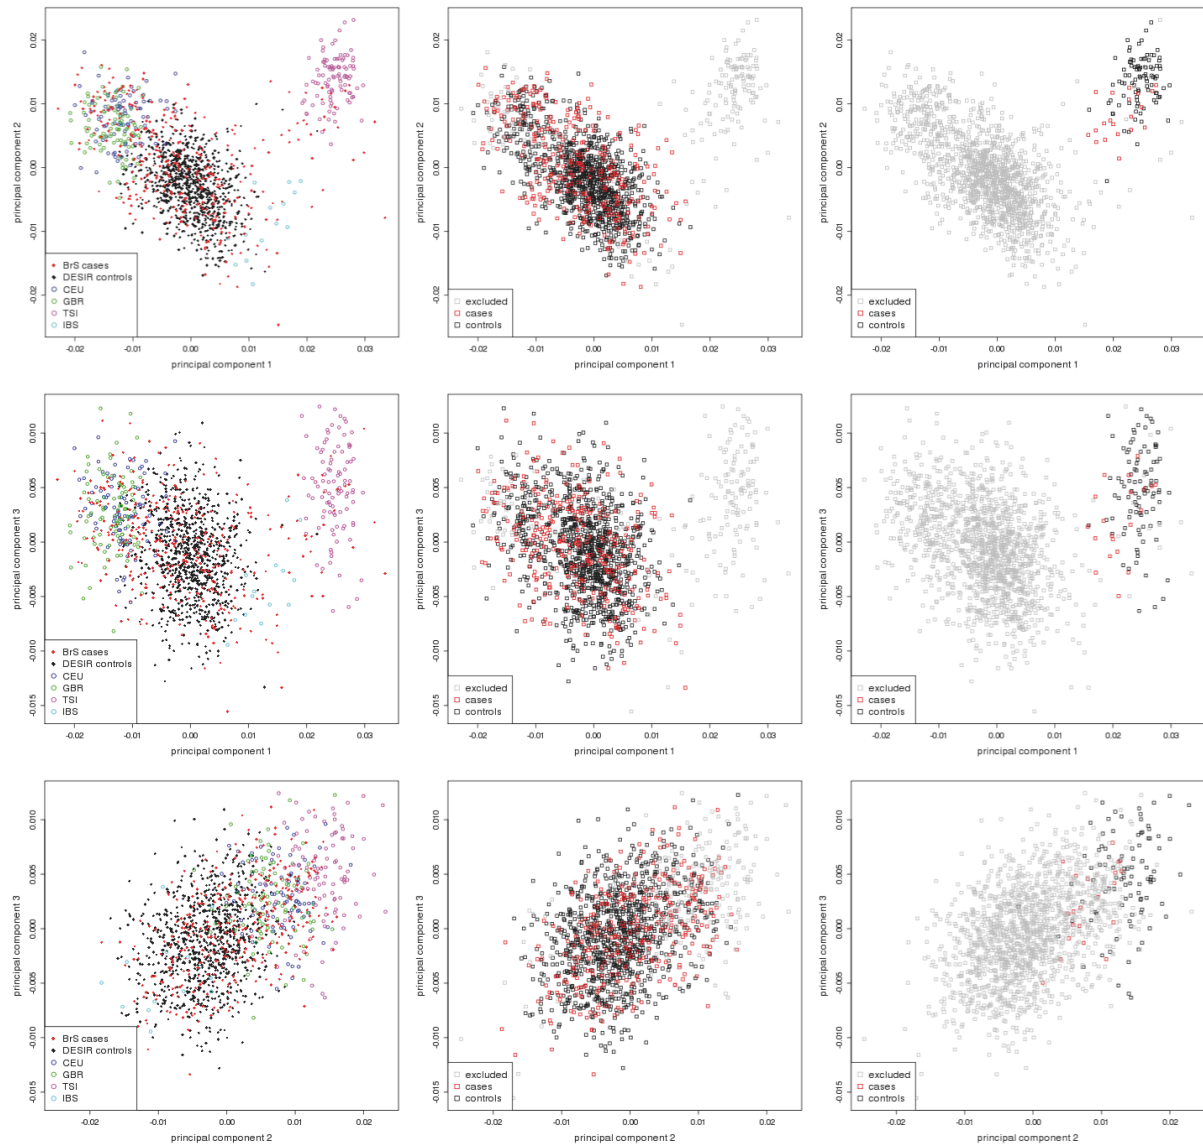

**Supplementary Figure 3: Quantile-quantile plot for the genome-wide association results**

**(a)** Q-Q plot of association results (inverse normal meta-analysis) for 360,149 SNPs in 312 cases and 1,115 ancestry-matched controls. The horizontal axis shows ( $-\log_{10}$  transformed) expected p values while the vertical axis indicates ( $-\log_{10}$  transformed) observed p values. Straight line indicates expected results under null hypothesis. **(b)** Zoomed view of the same Q-Q plot, indicating no widespread small differences in allele frequencies between cases and controls.

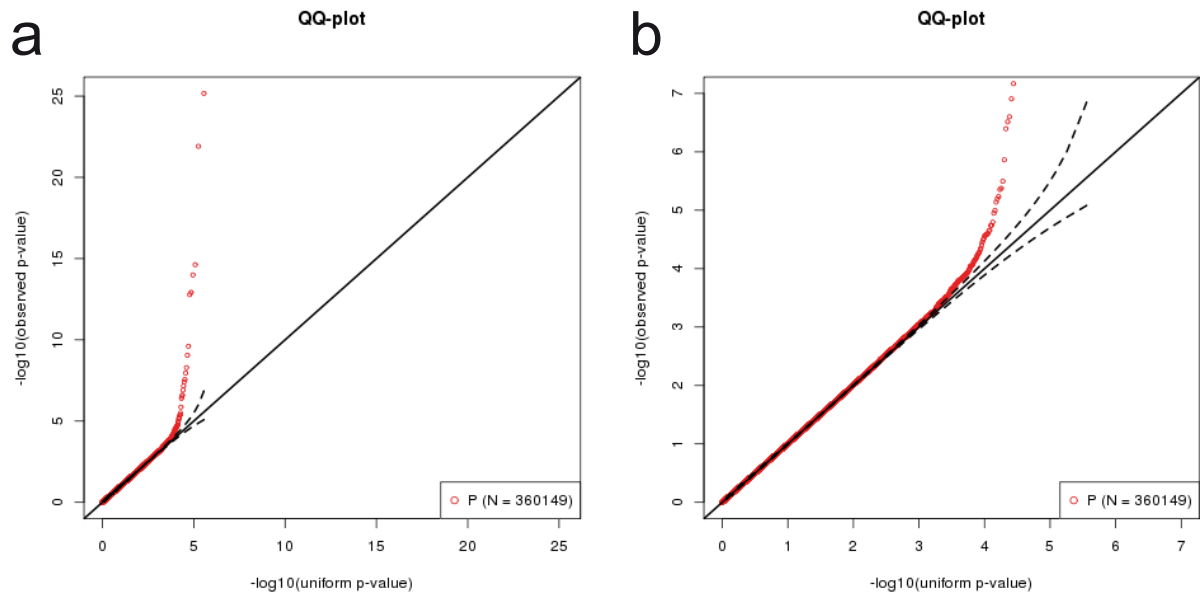

**Supplementary Figure 4: Manhattan plot and association results at each significantly associated locus after genome-wide imputation of non-genotyped alleles**

(a) Manhattan plot showing the association of SNPs with Brugada syndrome in a GWAS of 312 cases versus 1,115 controls, after imputation of the 1000 Genome Project variants (CEU population). The red horizontal line marks the threshold for genome-wide significance ( $P = 5 \times 10^{-8}$ ). Two loci reached genome-wide significance, on chromosomes 3 and 6. (b) Association plots at 3q22.2 (left panel) and 6q22.32 (right panel). Each SNP is plotted with respect to its chromosomal location (x-axis) and its P value (y-axis on the left). SNPs are coloured according to their degree of linkage disequilibrium ( $R^2$ ), with the leading variant highlighted with a purple square and displayed by name. The tall blue spikes indicate the recombination rate (y-axis on the right) at that region of the chromosome. The blue-outlined triangles indicate coding region SNPs. Coordinates are given according to NCBI build 37.

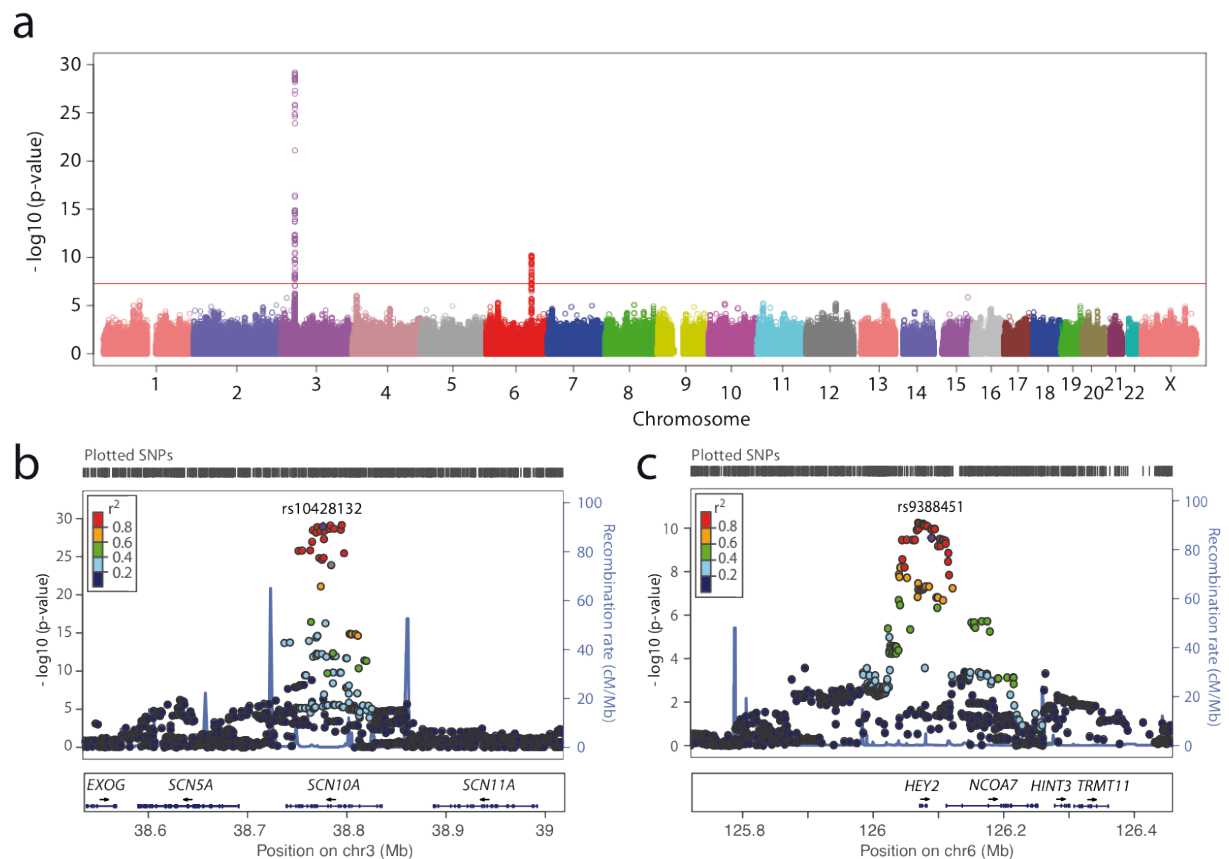

**Supplementary Figure 5: Restricting the GWAS to D.E.S.I.R. controls and ancestry-matched cases with Brugada syndrome by stringent MDS criteria confirms both association hits**

**(a)** On the left-panel, the first two principal components are plotted against one another for combined genotype data from the cases, D.E.S.I.R. controls, and European descent individuals from the 1000 Genomes Project (CEU, Utah residents (CEPH) with Northern and Western European ancestry; GBR, British from England and Scotland; TSI, Tuscan from Italy; IBS, Iberian populations from Spain). The right-panel displays the first two principal components for genotype data pertaining to the 856 D.E.S.I.R. controls and 254 cases used in the subsequent GWAS: the samples in grey were excluded from subsequent GWAS by applying stringent exclusion criteria. **(b)** The left-panel displays the Q-Q plot of association results for 364,984 SNPs in the 254 cases and the 856 ancestry-matched controls. The right-panel is a zoomed view of the same plot, indicating no widespread small differences in allele frequencies between cases and controls. **(c)** Manhattan plot showing SNP association with Brugada syndrome. The red horizontal line marks the threshold for genome-wide significance ( $P=5\times 10^{-8}$ ).

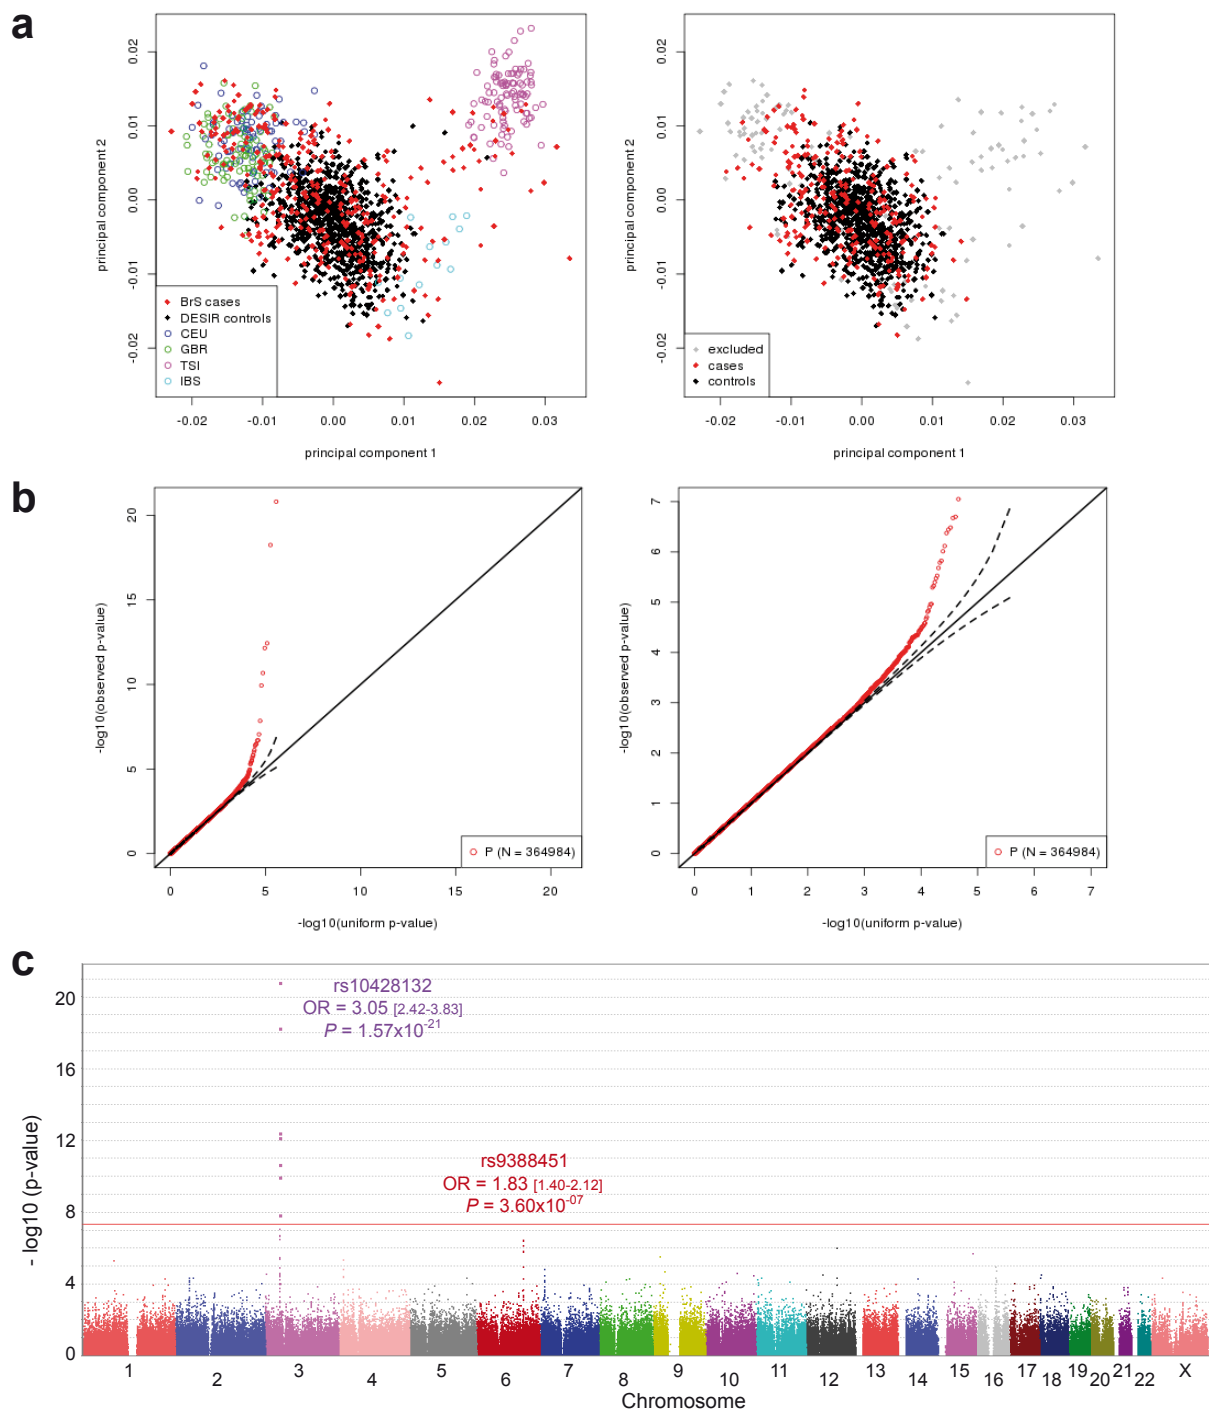

**Supplementary Figure 6: Q-Q plot for ECG-associated SNPs**

The analysis of 54 independent SNPs previously associated with ECG traits (after exclusion of the haplotype including rs10428132) results in a significant enrichment in association signals ( $P=5.0 \times 10^{-8}$ ). Note that, when all SNPs from the SCN5A/SCN10A locus were removed, a large decrease in statistical significance ( $P=0.0011$ ) was observed. The horizontal axis shows ( $-\log_{10}$  transformed) expected  $P$  values, the vertical axis ( $-\log_{10}$  transformed) observed  $P$  values. The straight line indicates expected results under the null hypothesis.

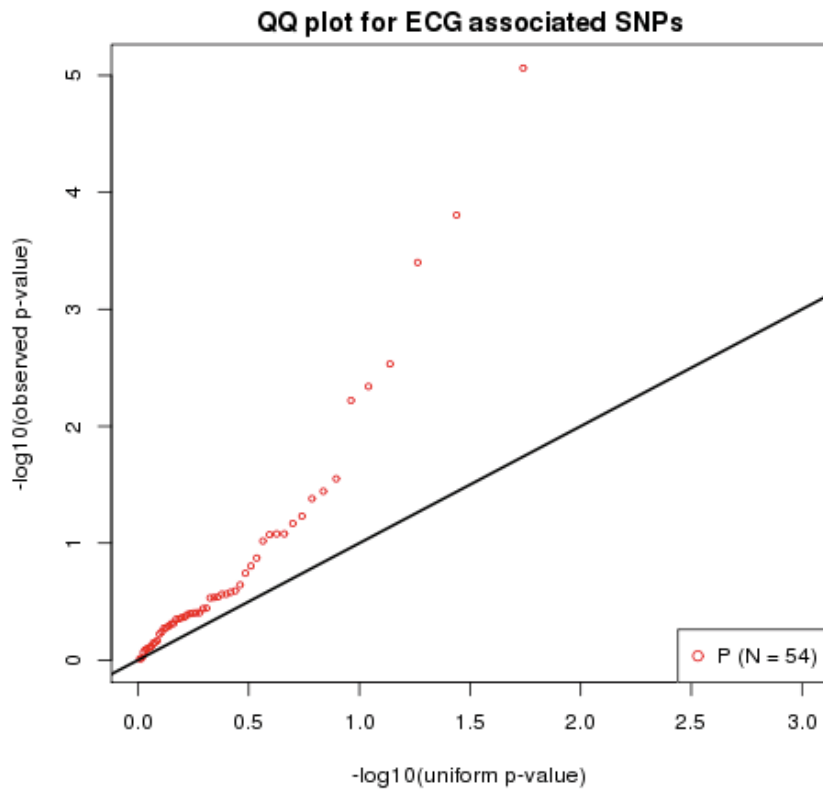

**Supplementary Figure 7: Q-Q plot for SNPs located at loci harboring susceptibility genes for Brugada syndrome**

The horizontal axis shows ( $-\log_{10}$  transformed) expected p values while the vertical axis indicates ( $-\log_{10}$  transformed) observed p values. Straight line indicates expected results under the null hypothesis.

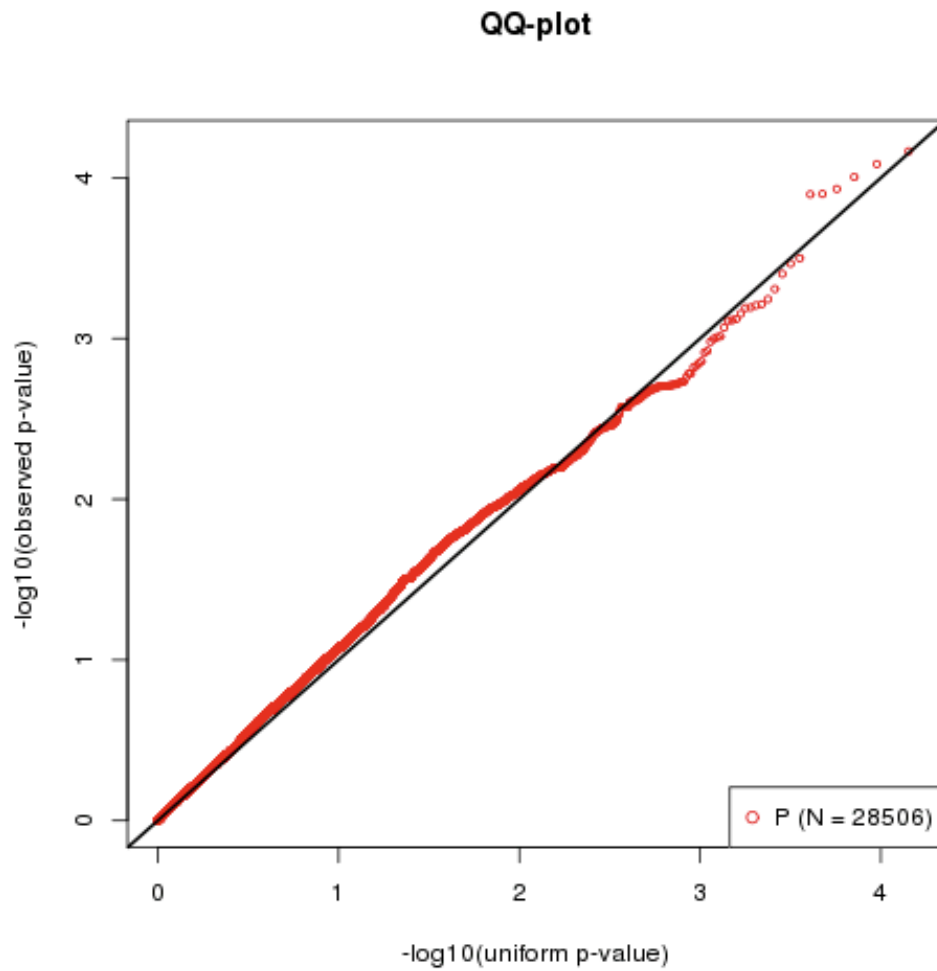

**Supplementary Figure 8:  $\text{Na}_v1.5$  patterning across the ventricular wall in *Hey2* knockout embryos and adult *Hey2*<sup>+/-</sup> hearts**

(a) Immunohistochemical staining displaying expanded expression of  $\text{Na}_v1.5$  in the compact zone of the ventricular myocardium (white arrowheads) in embryonic hearts (ED16.5) of *Hey2* knockout mice. Tnni3 (troponin I) is used as cardiomyocyte marker. Note the thinner (hypoplastic) left and right ventricular compact walls and the smaller and deformed right ventricle in knockout mice. La, left atrium; ra, right atrium; ivs, inter-ventricular septum; lv, left ventricle; rv, right ventricle; lbb, left bundle branch; avb, atrioventricular bundle; pv, pulmonary vein; lsh, left sinus horn. (b) Immunohistochemical staining of  $\text{Na}_v1.5$  in left ventricle (LV), right ventricle (RV) and right ventricular outflow tract (RVOT) regions of adult wild-type (WT) and *Hey2*<sup>+/-</sup> hearts. No differences in  $\text{Na}_v1.5$  distribution across the myocardial wall were detected between adult WT and *Hey2*<sup>+/-</sup> hearts (sub-epicardial layers are indicated by white arrowheads; scale bar: 25  $\mu\text{m}$ ).

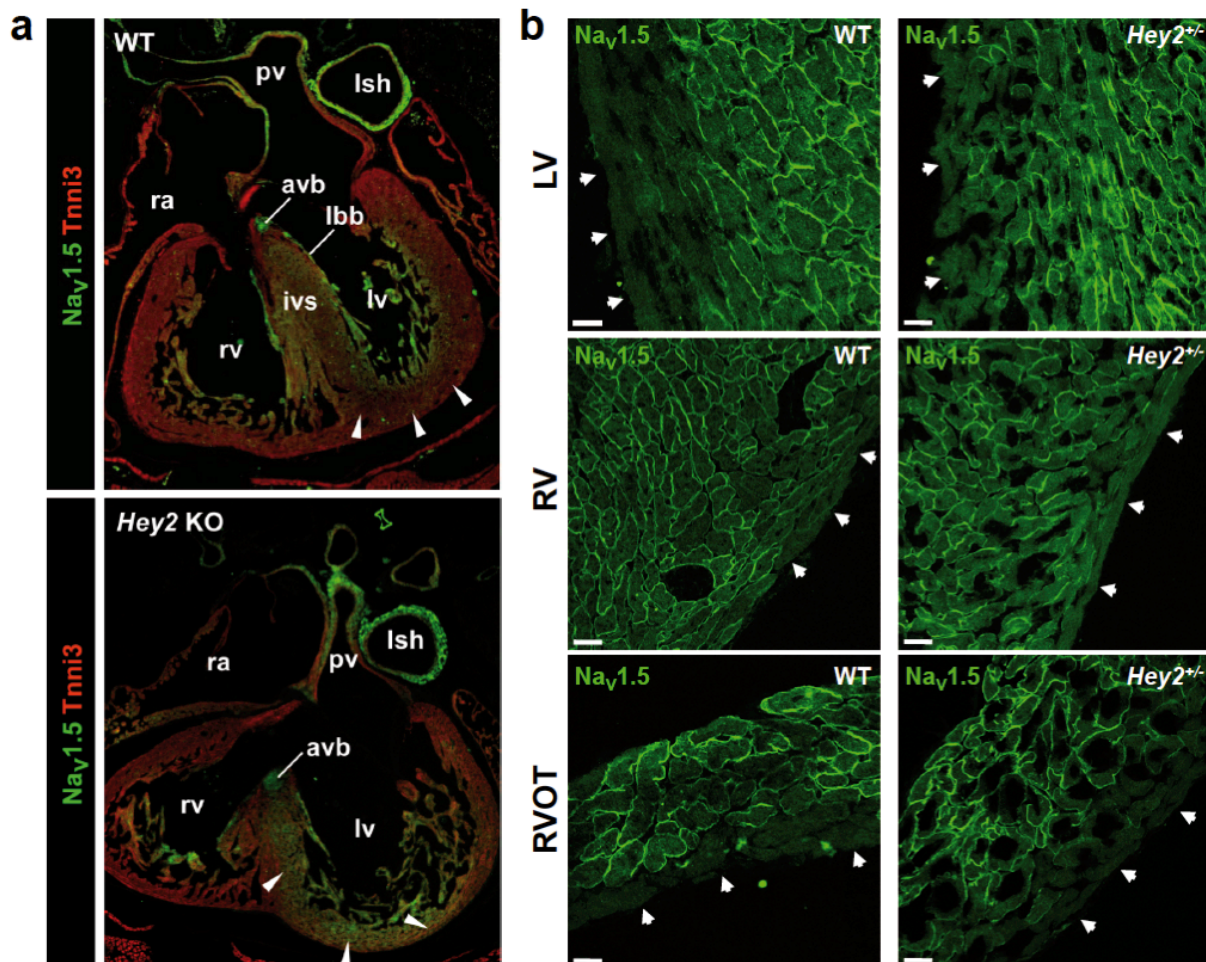



**Supplementary Figure 9: Heart weight in adult WT and *Hey2*<sup>+/-</sup> mice.**

Heart weight to body weight ratios (left) and heart weight to tibia length ratios (right) were similar in adult wild-type (WT, n=8) and *Hey2*<sup>+/-</sup> (n=8) mice.

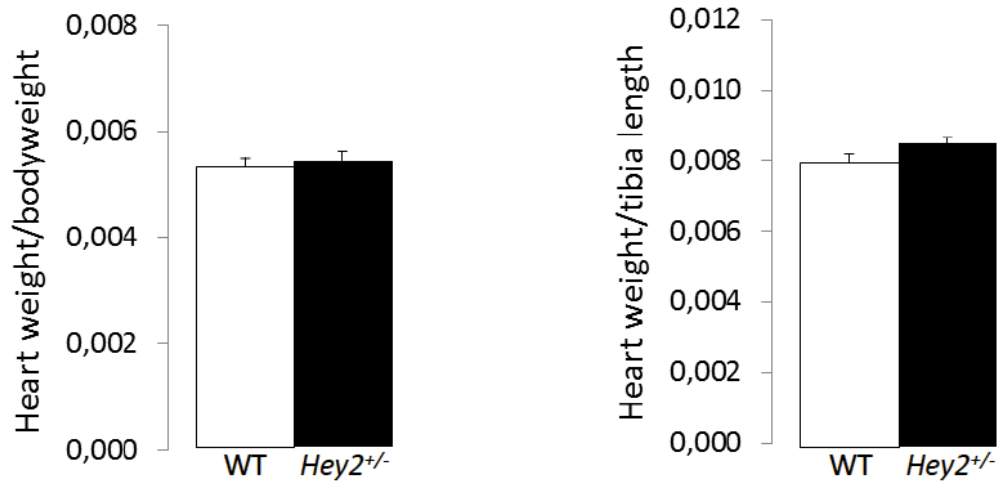



**Supplementary Figure 10: ECG data in adult WT and *Hey2*<sup>+/-</sup> mice.**

Surface ECG parameters measured from anaesthetized (isoflurane) adult wild-type (WT) and *Hey2*<sup>+/-</sup> mice. No significant differences in heart rate or PR-, QRS-, and QTc-intervals were observed between WT and *Hey2*<sup>+/-</sup> mice.

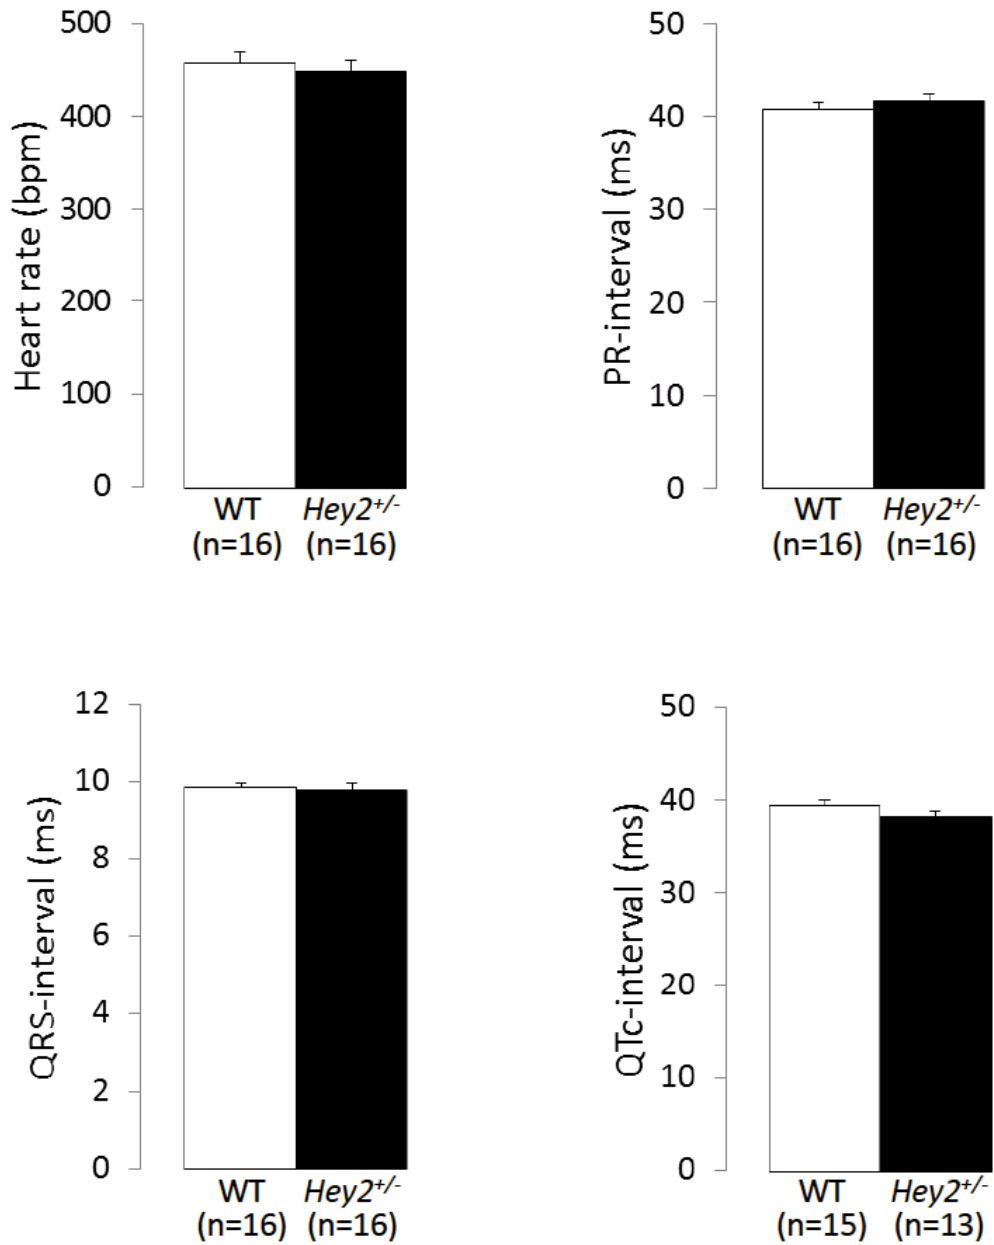

**Supplementary Figure 11: RV and LV conduction velocities in WT and *Hey2*<sup>+/-</sup> hearts.**

(a) Representative optical activation maps measured in right (RV) and left ventricle (LV) of isolated adult hearts. Hearts were stimulated at a basic cycle length of 120 ms, and longitudinal (CV-L) and transversal conduction velocities (CV-T) were measured as indicated. (b) Average longitudinal (CV-L) and transversal conduction velocities (CV-T) in LV and (c) RV were similar in WT and *Hey2*<sup>+/-</sup> hearts.

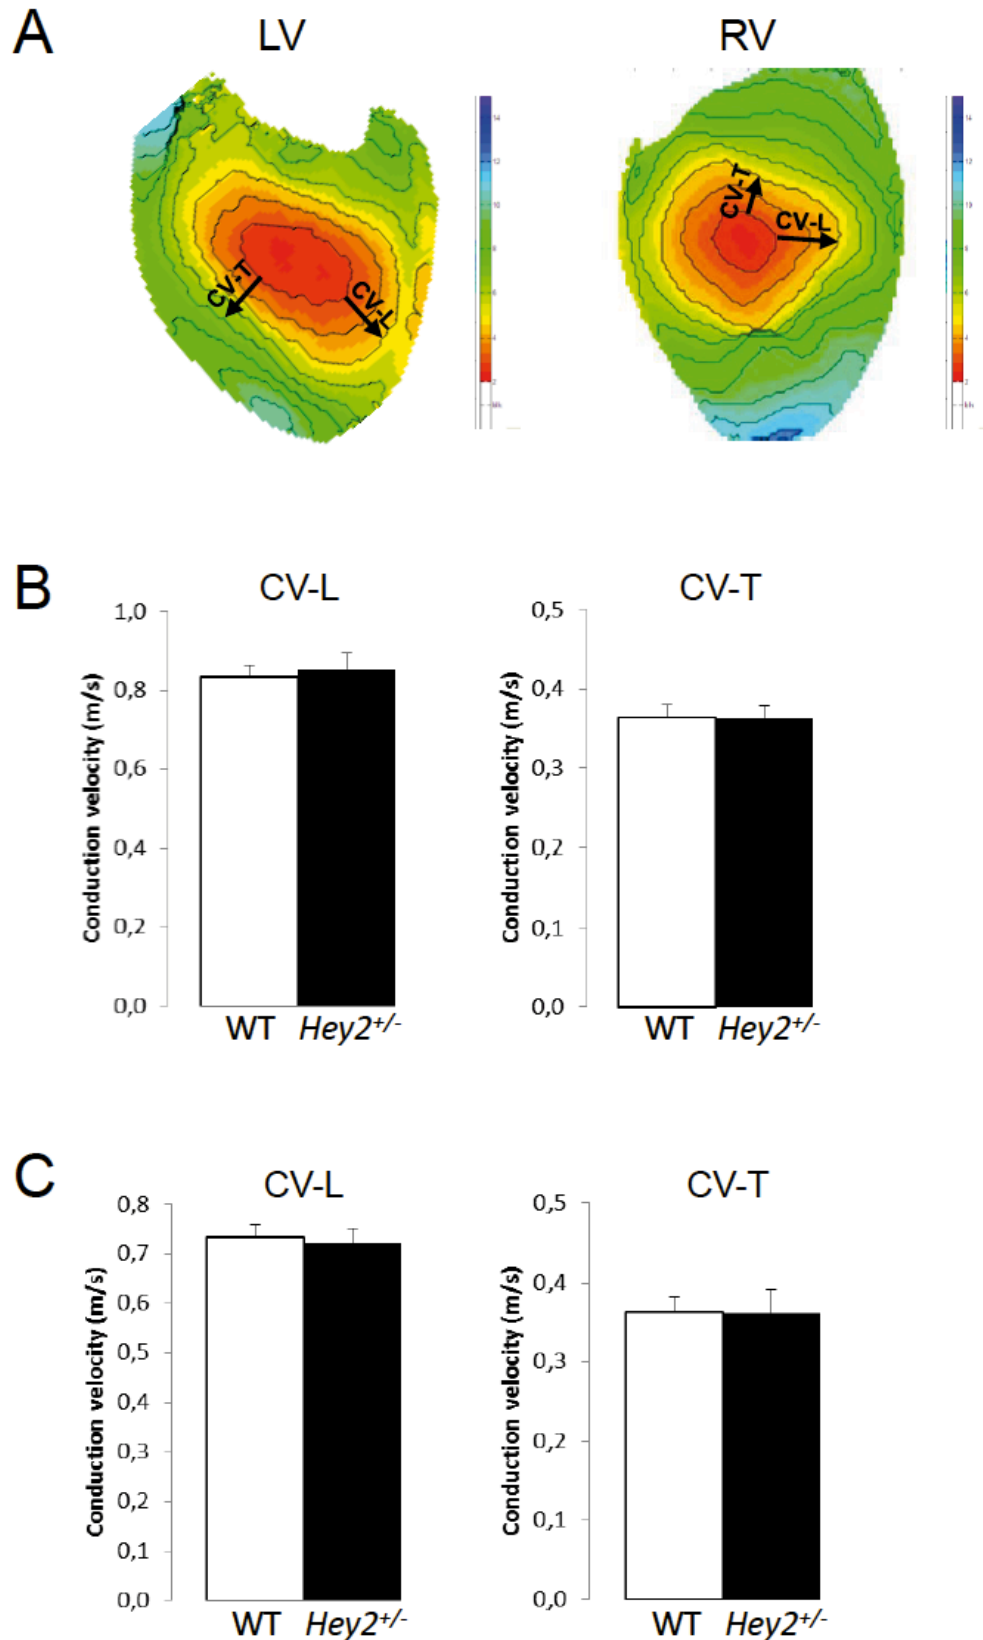

**Supplementary Figure 12: Genotyping plots for the three SNPs associated with Brugada syndrome**

**(a)** Cluster plots of the SNPs rs9388451, rs10428132 and rs11708996 genotyped on Affymetrix Axiom CEU-1 arrays for cases (top-panel) and controls (bottom-panel). Blue squares, red circles and green triangles indicated AA, AB and BB genotypes, respectively; “x” symbols indicate missing genotype calls. **(b)** Scatter plot analysis of TaqMan® Endpoint genotyping assay using a LightCycler® 480 Real-Time PCR System (Roche, Mannheim, Germany). **(c)** Scatter plot analysis of TaqMan® Endpoint genotyping assay using the ABI Prism 7900HT Sequence Detection System (Applied Biosystems, Foster City, CA, USA). The X-axis reports the FAM-fluorescence intensity; the Y-axis the VIC-fluorescence intensity. Green/blue triangles indicate homozygote genotypes; red triangles heterozygote samples; grey circles or “x” symbols missing genotype calls. Arrows indicate the samples for which genotypes were validated by capillary sequencing.

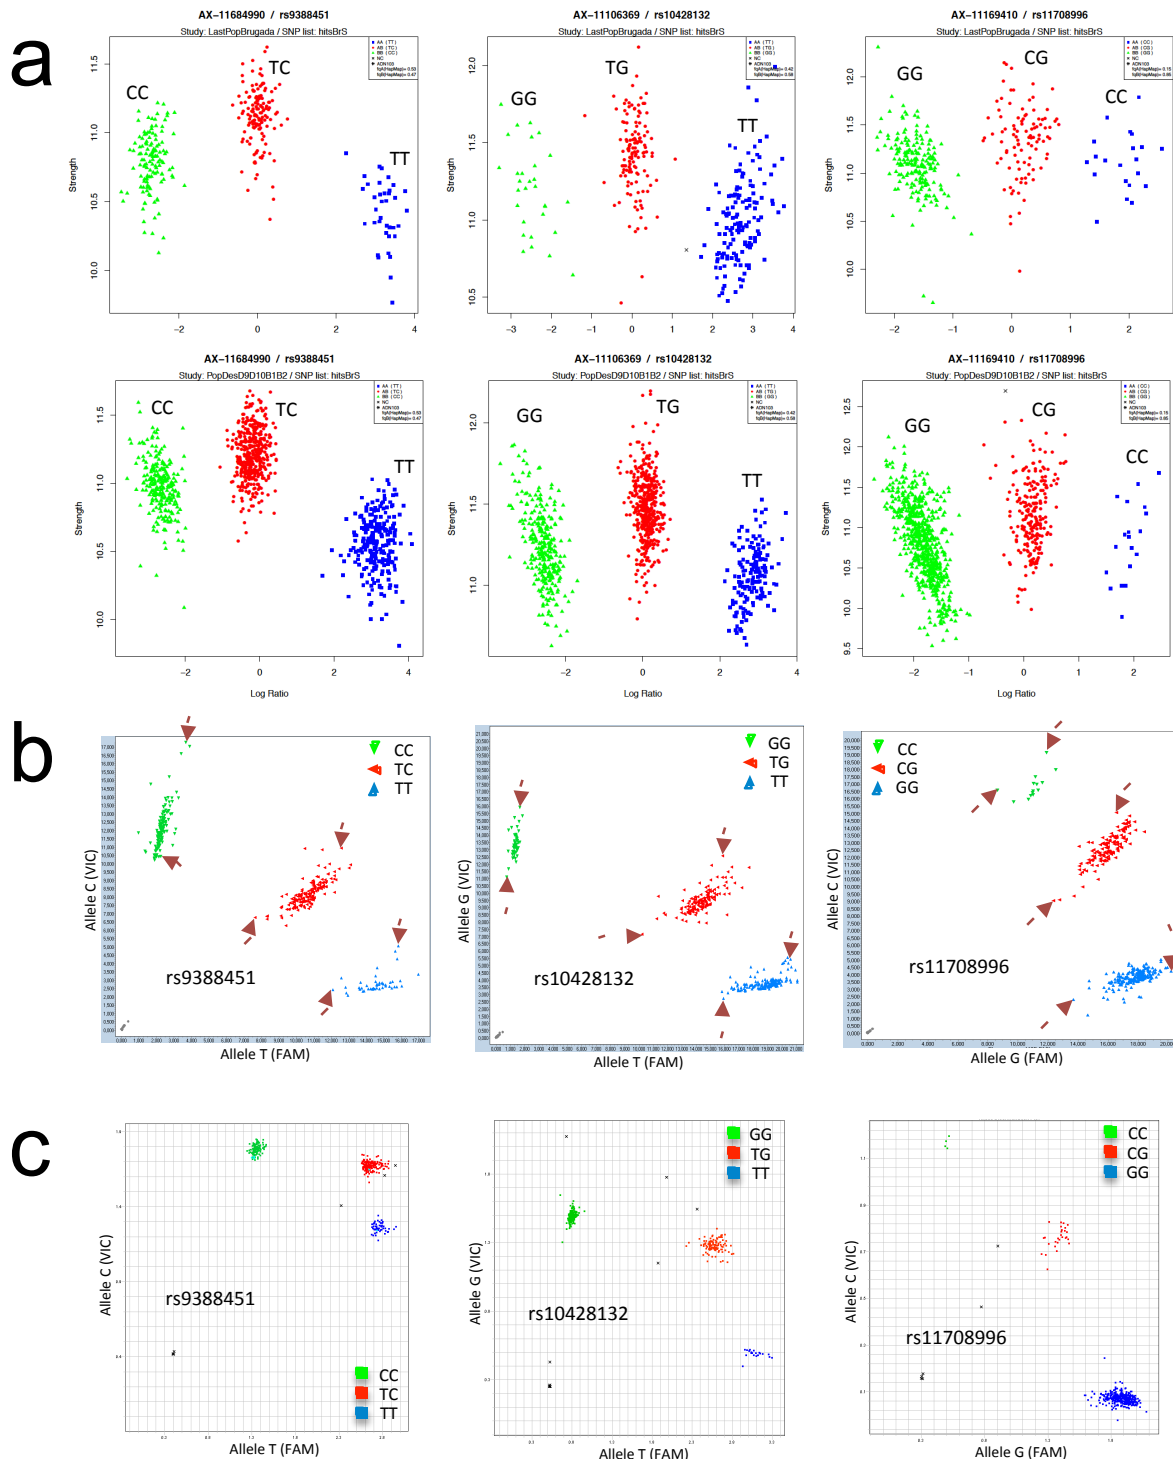

**Supplementary Figure 13: Quality control of imputed risk allele dosages**

(a) Distribution of imputed risk allele dosages for the control population (n=806) used in the European replication set. (b) Comparison of the genetic scores obtained with imputed *versus* typed SNPs for 49 individuals.

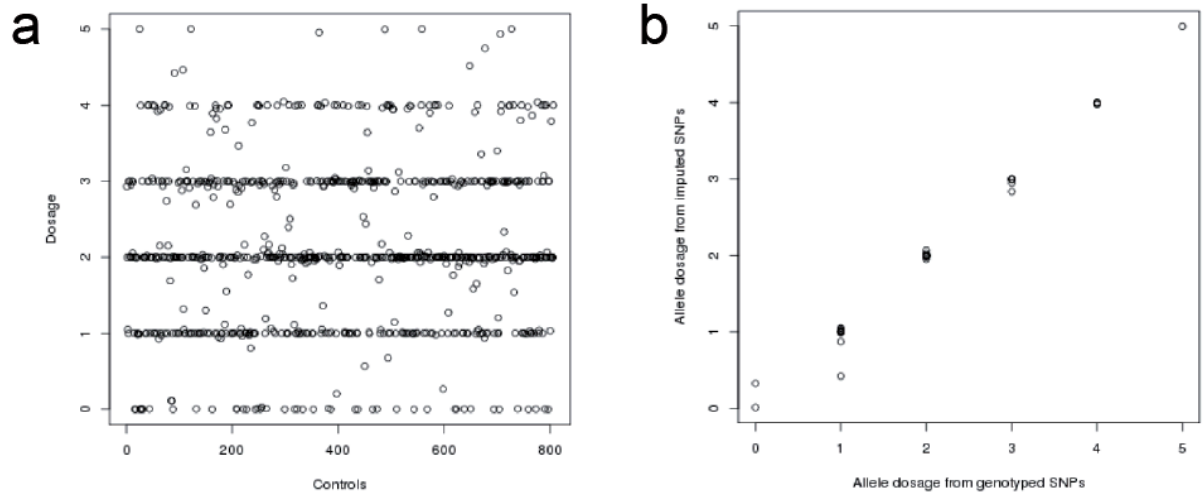

Supplement: NIHMS528125-supplement-OnlineSuppl.pdf [file NIHMS528125-supplement-OnlineSuppl.pdf]
